# The germline mutational process in rhesus macaque and its implications for phylogenetic dating

Lucie A. Bergeron<sup>1\*</sup>, Søren Besenbacher<sup>2</sup>, Jaco Bakker<sup>3</sup>, Jiao Zheng<sup>4,5</sup>, Panyi Li<sup>4</sup>, George Pacheco<sup>6</sup>, Mikkel-Holger S. Sinding<sup>7,8</sup>, Maria Kamilari<sup>1</sup>, M. Thomas P. Gilbert<sup>6,9</sup>, Mikkel H. Schierup<sup>10</sup> and Guojie Zhang<sup>1,4,11,12\*</sup>

1 Section for Ecology and Evolution, Department of Biology, University of Copenhagen, Copenhagen, Denmark

2 Department of Molecular Medicine, Aarhus University, Aarhus, Denmark

3 Animal Science Department, Biomedical Primate Research Centre, Rijswijk, Netherlands

4 BGI-Shenzhen, Shenzhen 518083, Guangdong, China

5 BGI Education Center, University of Chinese Academy of Sciences, Shenzhen 518083, Guangdong, China

6 Section for Evolutionary Genomics, The GLOBE Institute, University of Copenhagen, Copenhagen, Denmark

7 Trinity College Dublin, Dublin, Ireland

8 Greenland Institute of Natural Resources, Nuuk, Greenland

9 Department of Natural History, NTNU University Museum, Norwegian University of Science and Technology (NTNU), NO-7491 Trondheim, Norway

10 Bioinformatics Research Centre, Aarhus University, Aarhus, Denmark

11 State Key Laboratory of Genetic Resources and Evolution, Kunming Institute of Zoology, Chinese Academy of Sciences, Kunming 650223, China

12 Center for Excellence in Animal Evolution and Genetics, Chinese Academy of Sciences, Kunming 650223, China

\* Correspondence to Guojie Zhang - [guojie.zhang@bio.ku.dk](mailto:guojie.zhang@bio.ku.dk) or Lucie Bergeron - [lucie.a.bergeron@gmail.com](mailto:lucie.a.bergeron@gmail.com)

## 31 **Abstract**

32  
33 **Understanding the rate and pattern of germline mutations is of fundamental importance for**  
34 **understanding evolutionary processes. Here we analyzed 19 parent-offspring trios of rhesus macaques**  
35 **(*Macaca mulatta*) at high sequencing coverage of ca. 76X per individual, and estimated an average**  
36 **rate of  $0.73 \times 10^{-8}$  *de novo* mutations per site per generation (95 % CI:  $0.65 \times 10^{-8}$  -  $0.81 \times$**   
37  **$10^{-8}$ ). By phasing 50 % of the mutations to parental origins, we found that the mutation rate is**  
38 **positively correlated with the paternal age. The paternal lineage contributed an average of 80 % of**  
39 **the *de novo* mutations, with a trend of an increasing male contribution for older fathers. About 1.9**  
40 **% of *de novo* mutations were shared between siblings, with no parental bias, suggesting that they**  
41 **arose from early development (postzygotic) stages. Finally, the divergence times between closely**  
42 **related primates calculated based on the yearly mutation rate of rhesus macaque generally**  
43 **reconcile with divergence estimated with molecular clock methods, except for the**  
44 **Cercopithecidae/Hominoidea molecular divergence dated at 54 Mya using our new estimate of the**  
45 **yearly mutation rate.**

## 46 **Introduction**

47  
48 Germline mutations are the source of heritable disease and evolutionary adaptation. Thus, having precise  
49 estimates of germline mutation rates is of fundamental importance for many fields in biology, including  
50 searching for *de novo* disease mutations (Acuna-Hidalgo et al. 2016; Oliveira et al. 2018), inferring  
51 demographic events (Lapierre et al. 2017; Zeng et al. 2018), and accurate dating of species divergence  
52 times (Teeling et al. 2005; Ho and Larson 2006; Pulquério and Nichols 2007). Over the past ten years,  
53 new sequencing techniques have allowed deep sequencing of individuals from the same pedigree,  
54 enabling direct estimation of the *de novo* mutation rate for each generation, and precise estimation of the  
55 individual parental contributions to germline mutations across the whole genome. Most such studies have  
56 been conducted on humans, using large pedigrees with up to 3000 trios (Jónsson et al. 2017; Halldorsson  
57 et al. 2019), leading to a consensus estimate of  $\sim 1.25 \times 10^{-8}$  *de novo* mutation per site per generation, with  
58 an average parental age of  $\sim 29$  years, leading to a yearly rate of  $0.43 \times 10^{-9}$  *de novo* mutation per site per  
59 year and most variation between trios explained by the age of the parents (Awadalla et al. 2010; Roach et  
60 al. 2010; Kong et al. 2012; Neale et al. 2012; Wang and Zhu 2014; Besenbacher et al. 2015; Rahbari et al.  
61 2016; Jónsson et al. 2017; Maretty et al. 2017).  
62 The observed increases in the mutation rate with paternal age in humans and other primates (Venn et al.

63 2014; Jónsson et al. 2017; Thomas et al. 2018) has generally been attributed to errors during replication  
64 (Li et al. 1996; Crow 2000). In mammalian spermatogenesis, primordial germ cells go through meiotic  
65 divisions, to produce stem cells by the time of puberty. After this time, stem cell divisions occur  
66 continuously throughout the male lifetime. Thus, human spermatogonial stem cells have undergone 100  
67 to 150 mitoses in a 20 years old male, and ~ 610 mitoses in a 40 years old male (Acuna-Hidalgo et al.  
68 2016), leading to an additional 1.51 *de novo* mutations per year increase in the father's age (Jónsson et al.  
69 2017). Female age also seems to affect the mutation rate in humans, with 0.37 mutations added per year  
70 (Jónsson et al. 2017). This maternal effect cannot be attributed to replication errors, as different from  
71 spermatogenesis, female oocytogenesis occurs during embryogenesis process and is already finished  
72 before birth (Byskov 1986). Moreover, there seems to be a bias towards males in contribution to *de novo*  
73 mutations, as the paternal to maternal contribution is 4:1 in human and chimpanzee (Venn et al. 2014;  
74 Jónsson et al. 2017). One recent study proposed that damage-induced mutations might be a potential  
75 explanation for the observation of both the maternal age effect and the male-bias also present in parents  
76 reproducing right after puberty when replication mutations should not have accumulated yet in the male  
77 germline (Gao et al. 2019). Parent-offspring analyses can also be used to distinguish mutations that are  
78 caused by gametogenesis from mutations that emerge in postzygotic stages (Acuna-Hidalgo et al. 2015;  
79 Scally 2016). While germline mutations in humans are relatively well studied, it remains unknown how  
80 much variability exists among primates on the contribution of replication errors to *de novo* mutations, the  
81 parental effects, and the developmental stages at which these mutations are established (postzygotic or  
82 gametogenesis).

83 Up until now, the germline mutation rate has only been estimated using pedigrees in few non-human  
84 primate species, including chimpanzee (*Pan troglodytes*) (Venn et al. 2014; Tatsumoto et al. 2017;  
85 Besenbacher et al. 2019), gorilla (*Gorilla gorilla*) (Besenbacher et al. 2019), orangutan (*Pongo abelii*)  
86 (Besenbacher et al. 2019), African green monkey (*Chlorocebus sabaues*) (Pfeifer 2017) and owl monkey  
87 (*Aotus nancymaae*) (Thomas et al. 2018). The mutation rate of baboon (*Papio anubis*) (Wu et al. 2019),  
88 rhesus macaque (*Macaca mulatta*) (Wang et al. 2019) and grey mouse lemur (*Microcebus murinus*)  
89 (Campbell et al. 2019) have also been estimated in preprinted studies. To precisely call *de novo* mutations  
90 in the offspring, collecting and comparing the genomic information of the pedigrees is a first essential  
91 step for detecting mutations only present in offspring but not in either parent. Next, the *de novo* mutations  
92 need to be separated from sequencing errors or somatic mutations, which cause false-positive calls.  
93 Because mutations are rare events, detecting *de novo* mutations that occur within a single generation  
94 requires high sequencing coverage in order to cover a majority of genomic regions and identify the false-

95 positives. Furthermore, the algorithms used to estimate the mutation rate should take false-negative calls  
96 into account. However, a considerable range of sequencing depth (ranging from 18X (Pfeifer 2017) to  
97 120X (Tatsumoto et al. 2017)) has been applied in many studies for estimation of mutation rate. Different  
98 filtering methods have been introduced to reduce false-positives and false-negatives but the lack of  
99 standardized methodology makes it difficult to assess whether differences in mutation rate estimates are  
100 caused by technical or biological variability. In addition, most studies on non-human primates used small  
101 pedigrees with less than ten trios, which made it difficult to detect any statistically significant patterns  
102 over *de novo* mutation spectra.

103 Studying non-human primates could help us understanding whether the mutation rate is affected by life-  
104 history traits such as mating strategies or the age of reproduction. The variation in mutation rate among  
105 primates will also be useful for re-calibrating the speciation times across lineages. The sister group of  
106 Hominoidea is Cercopithecidae, including the important biomedical model species, rhesus macaque  
107 (*Macaca mulatta*), which share 93 % of its genome with humans (Gibbs et al. 2007). This species has a  
108 generation time estimate of ~ 11 years (Xue et al. 2016), and their sexual maturity is much earlier than in  
109 humans with females reaching maturity around three years old, while males mature around the age of 4  
110 years (Rawlins and Kessler 1986). While female macaques generally start reproducing right after  
111 maturation, males rarely reproduce in the wild until they reach their adult body size, at approximately  
112 eight years old (Bercovitch et al. 2003). They are also a promiscuous species, and do not form pair bonds,  
113 but reproduce with multiple individuals. These life-history traits, along with their status as the closest  
114 related outgroup species of the hominoid group, make the rhesus macaque an interesting species for  
115 investigating the differences and common features in mutation rate processes across primates.

116 In this study, we, produced high depth sequencing data for 33 rhesus macaque individuals (76X per  
117 individual) representing 19 trios. This particular dataset consists of a large number of trios, each with high  
118 coverage sequencing, and allowed us to test different filter criteria and choose the most appropriate ones  
119 to estimate the species mutation rate with high confidence. With a large number of *de novo* mutations  
120 phased to their parents of origins, we can statistically assess the parental contribution and the effect of the  
121 parental age. We characterize the type of mutations and their location on the genome to detect clusters  
122 and shared mutations between siblings. Finally, we use our new estimate to infer the effective population  
123 size and date their divergence time from closely related primate species.

124

## 125 **Results**

126

## 127 **Estimation of mutation rate for 19 trios of rhesus macaques**

128 To produce an accurate estimate for the germline mutation rate of rhesus macaques, we generated high  
129 coverage (76 X per individual after mapping, min 64 X, max 86 X) genome sequencing data for 19 trios  
130 of two unrelated families (Fig. 1). The first family consisted of two reproductive males and four  
131 reproductive females, and the second family had one reproductive male and seven reproductive females.  
132 In the first family, the pedigree extended over a third generation in two cases. The promiscuous mating  
133 system of rhesus macaques allowed us to follow the mutation rates in various ages of reproduction, and  
134 compare numerous full siblings and half-siblings.

135 We developed a pipeline for single nucleotide polymorphisms (SNP) calling with multiple quality control  
136 steps involving the filtering of reads and sites (see Methods). For each trio, we considered candidate sites  
137 as *de novo* mutations when i) both parents were homozygotes for the reference allele, while the offspring  
138 was heterozygous with 30 % to 70 % of its reads supporting the alternative allele, and ii) the three  
139 individuals passed the depth and genotype quality filters (see Methods). These filters were calibrated to  
140 ensure a low rate of false-positives among the candidate *de novo* mutations.

141 We obtained an unfiltered set of 21,246,733 candidate autosomal SNPs, of which 372,549 were potential  
142 Mendelian violations. Of these, 685 SNPs passed the filters as *de novo* mutations, ranging from 21 to 56  
143 for each trio and an average of 36 *de novo* mutations per trio ( $se = 2$ ) (see Supplementary Table 1). We  
144 manually curated all mutations using IGV on bam files and found that 624 mutations convincingly  
145 displayed as true positives. This leaves a maximum of 8.91 % (61 sites) that could be false-positives due  
146 to the absence of the variant in the offspring or presence of the variant in the parents (see Supplementary  
147 Fig. 1 and the 61 curated mutations in Supplementary). Most of those sites were in dinucleotide repeat  
148 regions or short tandem repeats (43 sites), while others were in non-repetitive regions of the genome (18  
149 sites). The manual curation may have missed the realignment executed during variant calling. Thus, in the  
150 absence of objective filters, we decided to keep these regions in the estimate of mutation rate but  
151 corrected the number of mutations for each trio with a false-positive rate (see equation 1 in Methods  
152 section).

153 To confirm the authenticity of the *de novo* mutations, we performed PCR experiments for all candidate *de*  
154 *novo* mutations from one trio before manual correction. We designed primers to a set of 39 *de novo*  
155 candidates among which 3 *de novo* mutations assigned as spurious from the manual inspection. Of these,  
156 24 sites were successfully amplified and sequenced for all three individuals i.e mother, father, and

157 offspring, including 1 of the spurious sites. Among those sequenced sites, 23 were correct, only one was  
158 wrong (Supplementary Fig. 2). This invalidated candidate was the spurious candidate removed by manual  
159 curation, therefore supporting our manual curation method. The PCR validation results suggested a lower  
160 false-positive rate of 4.2 % before manual curation. As the PCR validation was done only on 24  
161 candidates we decided to keep a strict false-positive rate of 8.91 % found by manual curation.

162 We then estimated the mutation rate, per site per generation, as the number of mutations observed, and  
163 corrected for false-positive calls, divided by the number of callable sites. The number of callable sites for  
164 each trio ranged from 2,329,878,451 to 2,349,925,275, covering on average 89 % of the autosomal sites  
165 of the rhesus macaque genome. A site was defined as callable when both parents were homozygotes for  
166 the reference allele, and all individuals passed the depth and genotype quality filters at that site. As  
167 callability is determined using the base-pair resolution vcf file, containing every single site of the  
168 genome, all filters used during calling were taken into account during the estimation of callability, except  
169 for the site filters and the allelic balance filter. We then corrected for false-negative rates, calculated as  
170 the number of “good” sites that could be filtered away by both the site filters and allelic balance filters -  
171 estimated at 4.28 % (see equation 1 in Methods section). Another method to estimate the false-negative  
172 rate is to simulate mutations on the bam files and evaluate the detection rate after passing through all  
173 filters. On 552 randomly simulated mutations among the 19 offsprings, 545 were detected as *de novo*  
174 mutations, resulting in a false-negative rate of 1.27 %. The 7 remaining mutations were filtered away by  
175 the allelic balance filter only, which can be explained by the reads filtering in the variant calling step.  
176 This result might be underestimated due to the methodological limitation of simulating *de novo*  
177 mutations, yet, it ensures that a false-negative rate of 4.28 % is not out of range. Thus, the final estimated  
178 average mutation rate of the rhesus macaques was  $0.73 \times 10^{-8}$  *de novo* mutations per site per generation  
179 (95 % CI  $0.65 \times 10^{-8}$  -  $0.81 \times 10^{-8}$ ). We removed the 61 sites that, based on manual curation, could  
180 represent false-positive calls from the following analyses (see the 624 *de novo* mutations in  
181 Supplementary Table 2).

182

### 183 **Parental contribution and age impact to the *de novo* mutation rate**

184 We observed a positive correlation between the paternal age and the mutation rate in the offspring  
185 (adjusted  $R^2 = 0.38$ ;  $P = 0.003$ ; regression:  $\mu = -8.265 \times 10^{-10} + 6.550 \times 10^{-10} \times age_{paternal}$ ;  $P = 0.003$ ;  
186 Fig. 2a). We also detected a positive correlation with the maternal age, though not significant (adjusted  
187  $R^2 = 0.13$ ;  $P = 0.073$ ; regression:  $\mu = 5.634 \times 10^{-9} + 2.005 \times 10^{-10} \times age_{maternal}$ ;  $P = 0.073$ ; Fig. 2b). A multiple

188 regression of the mutation rate on paternal and maternal age resulted in this formula:  $\mu_{Rhesus} = -5.324 \times 10^{-10}$   
189  $+ 7.009 \times 10^{-11} \times age_{maternal} + 5.840 \times 10^{-10} \times age_{paternal}$  (P = 0.01), where  $\mu_{Rhesus}$  is the mutation rate for the  
190 species.

191 We were able to phase 312 mutations to their parent of origin, which accounted for half of the total  
192 number of *de novo* mutations (624). There is a significant male bias in the contribution of *de novo*  
193 mutations, with an average of 79.7 % paternal *de novo* mutations (95 % CI 76.0 % - 83.4 %; T = 23.76,  
194 DF = 36, P <  $2.2 \times 10^{-16}$ ; Fig. 2c). Moreover, with half of the *de novo* mutations phased to their parent of  
195 origin, we were able to disentangle the effect of the age of each parent on mutation rate independently  
196 (Fig. 2d). By assuming that the ratio of mutations phased to a particular parent was the same in the phased  
197 mutations than in the unphased ones, we could predict the total number of mutations given by each  
198 parent. For instance, if an offspring had 40 *de novo* mutations and only half were phased, with 80 % given  
199 from its father, we would apply this ratio to the total number of mutations in this offspring, ending up  
200 with 32 *de novo* mutations from its father and eight from its mother. This analysis suggested a stronger  
201 male age effect to the number of mutations (adjusted  $R^2 = 0.42$ , P = 0.002), and a similar, non significant  
202 maternal age effect (adjusted  $R^2 = 0.10$ , P = 0.100). The two regression lines meet around the age of  
203 sexual maturity (3 years for females and 4 years for males), which is consistent with a similar  
204 accumulation of *de novo* mutations during the developmental process from birth to sexual maturity in  
205 both sexes, but the variances on the regression line slopes are large (see Fig. 2c and Supplementary Fig. 3  
206 for the same analysis with a Poisson regression). Using these two linear regressions, we can predict the  
207 number of *de novo* mutations in the offspring based on the age of each parent at the time of reproduction:  
208  $nb\ of\ mutations_{Rhesus} = 2.8835 + 0.4827 \times age_{maternal} - 2.2036 + 2.2588 \times age_{paternal}$ , where *nb of mutations*  
209 *Rhesus* is the number of *de novo* mutations for the given trio. The expected mutation rates calculated using  
210 the two different regression models show similar correlations with the observed mutation rate ( $R^2 = 0.66$ ,  
211 P = 0.002 for the first regression and  $R^2 = 0.65$ , P = 0.002 for the upscaled one, see Supplementary Fig.  
212 4). However, on the first regression on the mutation rate, the maternal age effect may be confounded by  
213 the paternal age, as maternal and paternal age are correlated in our dataset, yet, non-significantly ( $R^2 =$   
214 0.38, P = 0.106, see Supplementary Fig. 5). The upscaled regression unravels the effect of the parental  
215 age independently from each other. This regression can also be used to infer the contribution of each  
216 parent at different reproductive age. For instance, if both parents reproduce at 5 years old, based on the  
217 upscaled regression, the father is estimated to give ~ 9 *de novo* mutations (95 % CI: 0 – 19) and the  
218 mother ~ 5 *de novo* mutations (95 % CI: 3 – 8), corresponding to a contribution ratio from father to  
219 mother of 1.8:1 at 5 years old. If they reproduce at 15 years old, this ratio would be 3.2:1 with males

220 giving ~ 32 *de novo* mutations (95 % CI: 28 – 36) and females ~ 10 *de novo* mutations (95 % CI: 6 – 14).  
221 It seems that the male bias increases with the parental age, yet, our model was based on too few data  
222 points in early male reproductive ages to reach a firm conclusion. For the two extended trios for which a  
223 second generation is available, we looked at the proportion of *de novo* mutations in the first offspring that  
224 were passed on to the third generation - the third generation inherited a heterozygote genotype with the  
225 alternative allele being the *de novo* mutation. In one case, 67 % of the *de novo* mutations in the female  
226 (Heineken) were passed to her daughter (Hoegaarde), while in another case, 39 % of the *de novo*  
227 mutations in the female (Amber) were passed to her son (Magenta). These deviations from the expected  
228 50 % inheritance rate are not statistically significant (Binomial test;  $P_{\text{Hoegaarde}} = 0.10$  and  $P_{\text{Magenta}} = 0.26$ ).

229

### 230 **Characterizations of *de novo* mutations**

231 We characterized the type of *de novo* mutations and found that transition from a strong base to weak base  
232 ( $G > A$  and  $C > T$ ) were most common (311/624), with 43 % of those mutations located in CpG sites (Fig.  
233 3a). In total, 22.9 % (143/624) of the *de novo* mutations were located in CpG sites. This is slightly higher  
234 than what has been found in humans, for which 19 % of the *de novo* mutations are in CpG sites  
235 (Besenbacher et al. 2015), but not significantly (human:  $X^2 = 2.318$ ,  $df = 1$ ,  $P = 0.128$ ). Moreover, 32.0 %  
236 (136/424) of the transition mutations ( $A > G$  and  $C > T$ ) were in CpG sites, higher than what has been  
237 found in chimpanzee, with 24 % of the transition *de novo* mutations in CpG sites (Venn et al. 2014). The  
238 transition to transversion ratio (ti/tv) was 2.12, which is similar to the ratio observed in other species  
239 (human: ti/tv ~ 2.16 (Yuen et al. 2016); human ti/tv ~ 2.2 (Wang and Zhu 2014); chimpanzee: ti/tv ~ 1.98  
240 (Tatsumoto et al. 2017)). The 624 *de novo* mutations showed some clustering in the genome (Fig. 3b and  
241 Supplementary Fig. 6). Across all trios, we observed 8 clusters, defined as windows of 20,000 bp where  
242 more than one mutation occurred in any individual, involving 17 mutations. Two clusters were made of  
243 mutations from a single individual, accounting for four mutations (Fig. 3b). Overall, 2.72 % of the *de*  
244 *novo* mutations were located in clusters, and 0.64 % were mutations within the same individual located in  
245 a cluster, which is significantly lower than the 3.1 % reported in humans (Besenbacher et al. 2016) ( $X^2 =$   
246 11.84,  $DF = 1$ ,  $P = 0.001$ ; Supplementary Fig. 7, Supplementary Table 3). We observed 12 mutations  
247 occurring recurrently in more than one related individual (Tab. 1), which accounted for 1.9 % of the total  
248 number of *de novo* mutations (12/624) and 1.0 % of sites (6/618 unique sites). Four *de novo* mutations (2



249 sites) were shared between half-siblings on the maternal side, and 10 (5 sites) were shared between half-  
250 siblings on the paternal side. However, there was no significant difference between the proportion of  
251 mutations shared between pairs of individuals related on the maternal side (9 pairs, 0.73 % shared), and  
252 pairs related on their paternal side (53 pairs, 0.23 % shared; Fisher's exact test  $P = 0.07$ ). In 4 sites, the  
253 phasing to the parent of origin confirmed that the mutation was coming from the common parent for at  
254 least one individual (Tab. 1). Moreover, the phasing was never inconsistent by attributing a shared *de*  
255 *novo* mutation to the other parent than the parent in common. However, these shared sites did not appear  
256 mosaic in the parents as no alternative allele was observed in the parents except for one site where the  
257 common father had only one read supporting the alternative allele (out of 53 reads). Eight of the *de novo*  
258 mutations (1.1 % of the total *de novo* mutations) were located in coding sequences (CDS regions), which  
259 is close to the overall proportion of coding sequences region (1.2%) in the whole macaque genome. Seven  
260 out of those eight mutations were non-synonymous.

261

## 262 **Molecular dating with trio-based mutation rate**

263 Based on our inferred mutation rate and the genetic diversity of Indian rhesus macaques ( $\pi = 0.00247$ )  
264 estimated using whole genomic sequencing data from more than 120 unrelated wild individuals (Xue et  
265 al. 2016), we calculated the effective population size ( $N_e$ ) of rhesus macaques to be 84,336. This is higher  
266 than the  $N_e = 80,000$  estimated previously using  $\mu = 0.59 \times 10^{-8}$  from hippocampal transcriptome and  
267 H3K4me3-marked DNA regions from 14 individuals (Yuan et al. 2012), and  $N_e = 61,800$  estimated using  
268  $\mu = 1 \times 10^{-8}$  with 120 individual full genome data (Xue et al. 2016). Assuming a generation time of 11  
269 years and an average reproduction age of 10 years for females and 12 years for males, the yearly mutation  
270 rate of rhesus macaques was calculated based on our regression model of the number of mutations given  
271 by males and females independently, and the average callability (see equation 2 in the Methods section).  
272 As captive animals usually reproduce later than in the wild, which could impact the average mutation rate  
273 per generation, we used the regression instead of the mutation rate per generation to correct for this  
274 possible bias. The yearly mutation rate of rhesus macaques in our calculation was  $0.60 \times 10^{-9}$  per site per  
275 year, almost 1.5 times that of humans (Jónsson et al. 2017).

276 Given a precise evolutionary mutation rate is essential for accurate calibration of molecular divergence

277 events between species, we used the mutation rate we inferred for rhesus macaques to re-date the  
278 phylogeny of closely-related primate species with full genome alignment available (Moorjani et al. 2016)  
279 (Fig. 4a). The molecular divergence time ( $T_D$ ) is the time since an ancestral lineage started to split into  
280 two descendant lineages, and can be inferred from the genetic divergence between the two descendant  
281 lineages and the mutation rate. The speciation time ( $T_S$ ) is a younger event that implies no more gene  
282 flow between lineages (Steiper and Young 2008). On the backward direction, the alleles of two  
283 descendant lineages are randomly sampled from their parents until going back to the most recent common  
284 ancestor (Rosenberg and Nordborg 2002). This stochastic event, known as the coalescent, depends on the  
285 population sizes, being slower in a large population (Kingman, 1982). Thus, from the divergence time,  
286 the speciation time can be inferred given the rate of coalescence (see equation 3 in the Method section).  
287 We also compared our results to those of previous dating attempts based on molecular phylogenetic trees  
288 calibrated with fossils records (Fig. 4b). We found that the two methods concur for the most recent events.  
289 Specifically, we estimated that the *Macaca mulatta* and *Macaca fascicularis* genomes had already  
290 diverged around 4.02 million years ago (Mya) (95 % CI: 3.55 – 4.61), which is slightly older than  
291 previous estimates using the molecular clock calibrated with fossils, as the molecular divergence of the  
292 two species has been estimated at 3.44 Mya with mitochondrial data (Pozzi et al. 2014) and 3.53 Mya  
293 from nuclear data (Perelman et al. 2011). We estimated a speciation event between the two species 2.16  
294 Mya after the coalescent time, also consistent with previous findings of a most common recent ancestor to  
295 the two populations of the rhesus macaque, the Chinese and the Indian population, around 1.94 Mya  
296 based on coalescent simulations (Hernandez et al. 2007). For the next node, the molecular clock seems to  
297 differ between mitochondrial and nuclear data, as the divergence time for the Papionini group into the  
298 *Papio* and *Macaca* genera has been estimated to 8.13 Mya using nuclear data (Perelman et al. 2011), and  
299 12.17 Mya with mitochondrial data (Pozzi et al. 2014). We estimated a divergence time between these  
300 two genera of 13.57 Mya (95 % CI: 12.01 – 15.59). For earlier divergence events, our estimated  
301 divergence times are more ancient than previous reports. For instance, we estimated that the  
302 Cercopithecini and Papionini diverged 20.46 Mya (95 % CI: 18.11 – 23.51), while other studies had  
303 calculated 11.55 Mya using nuclear data (Perelman et al. 2011), and 14.09 Mya using mitochondrial data  
304 (Pozzi et al. 2014). Finally, the divergence between Cercopithecidae and Hominoidea has been reported  
305 between 25 and 30 Mya (Stewart and Disotell 1998; Moorjani et al. 2016), with an estimation of 31.6  
306 Mya using the nuclear molecular clock (Perelman et al. 2011) and 32.12 Mya using the mitochondrial one  
307 (Pozzi et al. 2014). Our dating of the divergence time between the Cercopithecidae and Hominoidea of  
308 53.89 Mya (95 % CI: 47.70 - 61.93) is substantially older than previous estimates. However, the

309 estimated speciation time inferred based on the ancestral population size, suggested a speciation of the  
310 Catarrhini group into two lineages 46.08 Mya (Fig. 4b).

311

## 312 **Discussion**

313

314 Despite many efforts to accurately estimate direct *de novo* mutation rates, it is still a challenging task  
315 due to the rare occurrence of *de novo* mutations, and the small sample size that is often available.  
316 Sequencing coverage is known to be a significant factor in affecting false-positive (FP), and false-  
317 negative (FN) calls when detecting *de novo* mutation (Acuna-Hidalgo et al. 2016; Tatsumoto et al.  
318 2017). A minimal sequencing coverage at 15X was recommended for SNPs calling (Song et al. 2016).  
319 However, such coverage cannot provide sufficient power to reduce FPs because the lower depth  
320 threshold cannot preclude Mendelian violations due to sequencing errors. Moreover, a larger portion of  
321 the genome would be removed in the denominator at low depth in order to reduce the FN. While most  
322 studies on direct estimation of mutation rate use 35–40X coverage (Jónsson et al. 2017; Thomas et al.  
323 2018; Besenbacher et al. 2019), their methods to reduce FP and FN differ. Some studies use the  
324 deviation from 50 % of the *de novo* mutation pass to the next generation to infer the false-positive rate  
325 (Jónsson et al. 2017; Thomas et al. 2018). Others use probabilistic methods to assess the callability  
326 (Besenbacher et al. 2019), or simulation of known mutation to control the pipeline quality (Pfeifer  
327 2017). Differences in methods likely impact the calculated rate. Here, we produced sequences at 76X  
328 coverage, which allows us to apply conservative filtering processes, while still obtaining high coverage  
329 (89 %) of the autosomal genome region when inferring *de novo* mutations. To our knowledge, only one  
330 other study has used very high coverage (120X per individuals), on a single trio of chimpanzees  
331 (Tatsumoto et al. 2017). Such high coverage allowed us to achieve a false-positive rate below 8.91 %  
332 and within the regions we deemed callable, we calculated a low false-negative rate of 4.28 %.  
333 Our estimated rate is higher than the  $0.58 \times 10^{-8}$  *de novo* mutations per site per generation estimated in  
334 a preprint report (Wang et al. 2019). The difference should be mainly attributed to the fact that they  
335 sequenced the offspring of younger parents (average parental age of 7.1 years for females and 7.8 years  
336 for males compared to 8.4 years for females and 12.4 years for males in this study). Using our  
337 regression from the phased mutation, we estimated a mutation rate of  $0.45 \times 10^{-8}$  per site per  
338 generation, when males reproduce at 7.8 years and females reproduce at 7.1 years old. Moreover, using  
339 their regression based on the age of puberty and the increase of paternal mutation per year, Wang and  
340 collaborators estimated a per generation rate of  $0.71 \times 10^{-8}$  mutations when males reproduce at 11

341 years, and a yearly rate of  $0.65 \times 10^{-9}$  mutations per site per year, which is approx 8% higher than our  
342 estimate of  $0.60 \times 10^{-9}$  (2019). This difference may be due to any combination of stochasticity,  
343 differences in *de novo* mutation rate pipelines (callability estimate, false-negative rate, and false-  
344 positive rate estimate) and different models for converting pedigree estimates to yearly rates. However,  
345 the close correspondence between these independently derived estimates serves to validate that the  
346 pipelines are largely consistent with one another. Our combination of high coverage data and a large  
347 number of trios allowed us to gain high confidence estimates of the germline mutation rate of rhesus  
348 macaques at around  $0.73 \times 10^{-8}$  *de novo* mutation per site per generation, ranging from  $0.43 \times 10^{-8}$  to  
349  $1.13 \times 10^{-8}$ . This is similar to the mutation rate estimated for other non-Hominidae primates;  $0.81 \times$   
350  $10^{-8}$  for the owl monkey (*Aotus nancymae*) (Thomas et al. 2018) and  $0.94 \times 10^{-8}$  for the African green  
351 monkey (*Chlorocebus sabaues*) (Pfeifer 2017), while all Hominidae seem to have a mutation rate that is  
352 higher than  $1 \times 10^{-8}$  *de novo* mutation per site per generation (Jónsson et al. 2017; Besenbacher et al.  
353 2019). However, if we count for the *de novo* mutation per site per year, the rate of rhesus macaque ( $0.60$   
354  $\times 10^{-9}$ ) is almost 1.5-fold the human one of  $0.43 \times 10^{-9}$  mutation per sites per year (Jónsson et al. 2017).  
355 One of the main factors affecting the mutation rate within the species is the paternal age at the time of  
356 reproduction, which was attributed to the accumulation of replication-driven mutations during  
357 spermatogenesis (Drost and Lee 1995; Li et al. 1996; Crow 2000), and has been observed in many other  
358 primates (Venn et al. 2014; Jónsson et al. 2017; Maretty et al. 2017; Thomas et al. 2018; Besenbacher et  
359 al. 2019). In rhesus macaques, the rate at which germline mutation increases with paternal age seems  
360 faster than in humans; we inferred 2.26 mutations more per year for the rhesus macaque father (95% CI  
361 0.97 - 3.54 for an average callable genome of 2.24 Mb), compared to 1.51 in humans (95% CI 1.45–  
362 1.57 for an average callable genome of 2.72 Mb) (Jónsson et al. 2017). For females, there is less  
363 difference, with 0.48 more mutations per year for the mother in rhesus macaque (95% CI -0.10 - 1.07),  
364 and 0.37 more per year in human mothers (95% CI 0.32–0.43) (Jónsson et al. 2017). In rhesus  
365 macaques, males produce a larger number of sperm cells per unit of time ( $23 \times 10^6$  sperm cells per gram  
366 of testis per day (Amann et al. 1976)) than humans ( $4.4 \times 10^6$  sperm cells per gram of testis per day  
367 (Amann and Howards 1980)). This could imply a higher number of cell division per unit of time in  
368 rhesus macaques and thus more replication error during spermatogenesis. This is also consistent with  
369 the generation time effect which stipulates that an increase in generation time would decrease the  
370 number of cell division per unit of time as well as the yearly mutation rate assuming that most  
371 mutations arise from replication errors (Wu and Lit 1985; Goodman et al. 1993; Ohta 1993; Li et al.  
372 1996; Ségurel et al. 2014; Scally 2016). Indeed, humans have a generation time of 29 years, while it is

373 11 years for rhesus macaques. Another explanation for a higher increase of mutation rate with paternal  
374 age could be differences in the replication machinery itself. Due to higher sperm competition in rhesus  
375 macaque, the replication might be under selective pressure for fast production at the expense of  
376 replication fidelity, leading to less DNA repair mechanisms. As in other primates, we found a male bias  
377 in the contribution of *de novo* mutations, as the paternal to maternal ratio is 3.9:1. However, this ratio is  
378 between the 2.7:1 ratio observed in mice (Lindsay et al. 2019) and the 4:1 ratio observed in humans  
379 (Goldmann et al. 2016; Jónsson et al. 2018; Lindsay et al. 2019). Similarly to the wild, the males of our  
380 dataset reproduced from 10 years old, which did not allow us to examine if the contribution bias was  
381 also present just after maturation. Moreover, the promiscuous behavior of rhesus macaque leads to  
382 father reproducing with younger females. Using our model to compare the contribution of each parent  
383 reproducing at the similar age, it seems that the male bias increases with the parental age, with a similar  
384 contribution at the time of sexual maturation (1.7:1 for parents of 5 years old) and an increase in male to  
385 female contribution with older parents (3.1:1 for parents of 15 years old). This result differs from  
386 humans, where the male bias seems constant over time (Gao et al. 2019), but more time points in  
387 macaque would be needed to interpret the contribution over time. In rhesus macaques, the ratio of  
388 paternal to maternal contribution to the shared mutations between related individuals is 1:1, similarly to  
389 what has been shown in mice (Lindsay et al. 2019), highlighting that those mutations probably occur  
390 during primordial germ cell divisions in postzygotic stages. Our study shows many shared patterns in  
391 the *de novo* mutations among non-Hominid primates. More estimation of mammals could help  
392 understanding if these features are conserved across a broad phylogenetic scale. Moreover, further work  
393 would be needed to understand if some gamete production stages are more mutagenic in some species  
394 than others.

395 An accurate estimation of the mutation rate is essential for the precise dating of species divergence events.  
396 We used the rhesus macaque mutation rate to estimate its divergence time with related species for which  
397 whole-genome alignments are already available and their molecular divergence times have been  
398 investigated before with other methods (Moorjani et al. 2016). The results of our direct dating method,  
399 based on molecular distances between species and *de novo* mutation rate, matched those of traditional  
400 molecular clock approaches for speciation events within 10 to 15 million years. However, it often produced  
401 earlier divergence times for more ancient nodes than the molecular clock method. This incongruence might  
402 be attributed to the fossils that were used for calibration with the clock method, which has many  
403 limitations (Heads 2005; Pulquério and Nichols 2007; Steiper and Young 2008). A fossil used for  
404 calibrating a node is usually selected to represent the oldest known specimen of a lineage. Still, it

405 cannot be known if real even older specimens existed (Heads 2005). Thus, a fossil is usually assumed to  
406 be younger than the real divergence time of the species (Benton et al. 2015). Moreover, despite the error  
407 associated with the dating of a fossil itself, determining its position on a tree can be challenging and  
408 have effects on the inferred ages across the whole tree (Pulquério and Nichols 2007; Steiper and Young  
409 2008). For instance, the Catarrhini node, marking the divergence between the Cercopithecidae and the  
410 Hominoidea, is often calibrated in primate phylogenies (Heads 2005). This node has been calibrated to  
411 approx. 25 Mya using the oldest known Cercopithecidae fossil (*Victoriapithecus*), and the oldest known  
412 Hominoidea fossil (*Proconsul*), both around 22 My old (Goodman et al. 1998). However, if the oldest  
413 Catarrhini fossil (*Aegyptopithecus*) of 33 to 34 My age is used, this node could also be calibrated to 35  
414 Mya (Stewart and Disotell 1998). Finally, instead of being an ancestral specimen of the Catarrhini,  
415 *Aegyptopithecus* has been suggested as a sister taxon to Catarrhini, which would lead to an even older  
416 calibration time for this node (Stewart and Disotell 1998).

417 On the other hand, the direct mutation rate estimation could have produced overestimated divergence  
418 times for the Catarrhini node age compared to previous estimates (Perelman et al. 2011; Pozzi et al.  
419 2014), because the mutation rate and generation time might change cross-species and over time. It is  
420 possible that the Catarrhini ancestor would have had a faster yearly mutation rate, and/or a shorter  
421 generation time than the recent macaques. Since fossil calibration could underestimate real divergence  
422 times, molecular-based methods could overestimate it, especially by assuming a unique mutation rate to  
423 an entire clade (Steiper and Young 2008).

424 To obtain more confidence in the estimation of divergence time, it would be necessary to have an accurate  
425 estimation of the mutation rate for various species. The estimates available today for primates vary from  
426  $0.81 \times 10^{-8}$  per site per generation for the Owl monkey (*Aotus nancymaae*) to  $1.66 \times 10^{-8}$  per site per  
427 generation for Orangutan (*Pongo abelii*). However, the different methods and sequencing depth make it  
428 difficult to compare between species and attribute differences to biological causes or methodological  
429 ones. Therefore, more standardized methods in further studies would be needed to allow for cross-  
430 species comparison.

431

## 432 **Methods**

433

434 **Samples.** Whole blood samples (2 mL) in EDTA (Ethylenediaminetetraacetic acid) were collected from  
435 53 Indian rhesus macaques (*Macaca mulatta*) during routine health checks at the Biomedical Primate  
436 Research Centre (BPRC, Rijswijk, Netherlands). Individuals originated from two groups, with one or two

437 reproductive males per group. After ensuring the relatedness with a test based on individual genotypes  
438 (Manichaikul et al. 2010), we ended up with 19 trios formed by 33 individuals and two extended trios (for  
439 which a second generation was available). In our dataset males reproduced from 10 years old to 14.5  
440 years old (♂ reproductive range: 4.5 years), and females from 3.5 years old to 15.7 years old (♀  
441 reproductive range: 12.2 years). Genomic DNA was extracted using DNeasy Blood and Tissue Kit  
442 (Qiagen, Valencia-CA, USA) following the manufacturer's instructions. BGIseq libraries were built in  
443 China National GeneBank (CNGB), Shenzhen, China. The average insert size of the samples was 230  
444 base pairs. Whole-genome pair-ended sequencing was performed on BGISEQ500 platform, with a read  
445 length of 2x100 bp. The average coverage of the raw sequences before trimming was 81X per sample (SE  
446 = 1.35). Whole-genome sequences have been deposited in NCBI (National Center for Biotechnology  
447 Information) with BioProject number PRJNA588178 and SRA submission SUB6522592.

448  
449 **Reads mapping, SNPs calling, and filtering pipeline.** Adaptors, low-quality reads, and N-reads were  
450 removed with SOAPnuke filter (Chen et al. 2017). Trimmed reads were mapped to the reference genome  
451 of rhesus macaque Mmul 8.0.1 using BWA-MEM version 0.7.15 with the estimated insert size option.  
452 Only reads mapping uniquely were kept and duplicates were removed using Picard MarkDuplicates. The  
453 average coverage after mapping was 76X per individuals (SE = 1.16). Variants were called using GATK  
454 4.0.7.0 (Poplin et al. 2018); calling variants for each individual with HaplotypeCaller in BP-  
455 RESOLUTION mode; all gVCF files per sample were combined into a single one using CombineGVCFs  
456 per autosomal chromosomes; finally joint genotyping was applied with GenotypeGVCF. Because *de novo*  
457 mutations are rare events, variant quality score recalibration (VQSR) is not a suitable tool to filter the sites  
458 as *de novo* mutations are more likely to be filtered out as low-quality variants. Instead we used a site  
459 filtering with the following parameters: QD < 2.0, FS > 20.0, MQ < 40.0, MQRankSum < - 2.0,  
460 MQRankSum > 4.0, ReadPosRankSum < - 3.0, ReadPosRankSum > 3.0 and SOR > 3.0. These  
461 filters were chosen by first, running the pipeline with the site filters recommended by GATK (QD <  
462 2.0; FS > 60.0; MQ < 40.0; MQRankSum < -12.5; ReadPosRankSum < -8.0 ; SOR > 3.0), then,  
463 doing a manual curation of the candidates *de novo* mutations on the Integrative Genome Viewer  
464 (IGV). Finally, we identified the common parameters within the apparent false-positive calls and decided  
465 to adjust the site filter to remove as many false-positives without losing much true positive calls (see the  
466 pipeline Supplementary Fig. 8).

467  
468 **Detection of *de novo* mutations.** The combination of high coverage (76X) and stringent filters reduced

469 false-positive - calling a *de novo* mutation while it is not there. Thus, for each trio, we applied the  
470 following filters:

- 471 (a) Mendelian violations were selected using GATK SelectVariant and refined to only keep sites  
472 where both parents were homozygote reference (HomRef), and their offspring was heterozygote  
473 (Het).
- 474 (b) In the case of a *de novo* mutation, the number of alternative alleles seen in the offspring should  
475 account for ~ 50 % of the reads. Our allelic balance filter allowed the alternative allele to be  
476 present in 30 % to 70 % of the total number of reads (applying the same 30% cutoff as in other  
477 studies (Kong et al. 2012; Besenbacher et al. 2015; Francioli et al. 2015; Supplementary Fig. 9).
- 478 (c) The depth of the three individuals was filtered to be between  $0.5 \times m_{depth}$  and  $2 \times m_{depth}$ , with  $m_{depth}$   
479 being the average depth of the trio. Most of the Mendelian violations are due to sequencing  
480 errors in regions of low sequencing depth; therefore, we applied a stricter threshold on the  
481 minimum depth to avoid the peak of Mendelian violations around 20X (Supplementary Fig. 10).  
482
- 483 (d) Finally, after analyzing each trio with different genotype quality GQ cutoff (from 10 to 90), we  
484 set up a filter on the genotype quality of 60 to ensure the genotypes of the HomRef parents and  
485 the Het offspring (Supplementary Fig. 11).

486 From 21,246,733 autosomal SNPs, 372,549 were potential Mendelian violations found by GATK,  
487 208,447 were filtered Mendelian violations with parents HomRef and offspring Het (a), 65,731 passed  
488 the allelic balance filter (b), 13,197 passed the depth filter (c) and 690 the genotype quality filter (d)  
489 (see Supplementary Table 4 for details on each individual). We also remove sites where a *de novo*  
490 mutation was shared among non-related individuals (1 site shared between 5 unrelated individuals).  
491 This allowed us to detect the number of *de novo* mutations observed per trio called *m*. We manually  
492 checked the reads mapping quality for all *de novo* mutations sites in the Integrative Genome Viewer  
493 (IGV). And we found possible false-positive calls in 8.9 % of the sites for which the variant was absent  
494 from the offspring or also present in a parent (see Supplementary Fig. 1). We kept those sites for the



495 estimation of the mutation rate, and corrected for false-positive ( $\beta = 0.0891$ ), but removed them for  
496 downstream pattern analysis. We experimentally validated the *de novo* candidates from the trio Noot  
497 (father), Platina (mother), and Lithium (offspring). Primers were designed for the 39 candidates  
498 (Supplementary Table 5). PCR amplification and Sanger sequencing were conducted on each individual  
499 (protocol in Supplementary materials). On 24 sites the PCR amplification and sequencing returned  
500 high-quality results for all three individuals. A candidate was considered validated when both parents  
501 showed homozygosity for the reference allele and the offspring showed heterozygosity (Supplementary  
502 Fig. 2). All sequences generated for the PCR validation have been deposited in Genbank with accession  
503 numbers MT426016 - MT426087 (Supplementary Table 4).

504 **Estimation of the mutation rate per site per generation.** From the number of *de novo* mutations to an  
505 estimate of the mutation rate per site per generation, it is necessary to also correct for false-negatives - not  
506 calling a true *de novo* mutation as such. To do so, we estimated two parameters: the false-negative rate  
507 and the number of callable sites,  $C$ , ie. the number of sites in the genome where we would be able to  
508 call a *de novo* mutation if it was there. We used the BP\_RESOLUTION option in GATK to call variants  
509 for each position and thus get the exact genotype quality for each site in each individual - also sites that  
510 are not polymorphic. So unlike other studies, we do not have to rely on sequencing depth as a proxy for  
511 genotype quality at those sites. Instead, we can apply the same genotype quality threshold to the non-  
512 polymorphic sites as we do for *de novo* mutation candidate sites. This should lead to a more accurate  
513 estimate of the number of callable sites. For each trio,  $C$  is the sum of all sites where: both parents are  
514 HomRef, and the three individuals passed the depth filter (b) and the genotype quality filter (d). To  
515 correct for our last filter, the allelic balance (c), we estimated the false-negative rate  $\alpha$ , defined as the  
516 proportion of true heterozygotes sites (one parent HomRef, the other parent HomAlt and their offspring  
517 Het) outside the allelic balance threshold (Supplementary Fig. 9). We also implemented in this  
518 parameter the false-negative rate of the site filters following a normal distribution (FS, MQRankSum,  
519 and ReadPosRankSum). For all trios combined, the rate of false-negatives caused by the allele balance  
520 filter and the site filters was 0.0428. To validate this false-negative rate estimation we also used a  
521 simulation method, used in other studies (Keightley et al. 2015; Pfeifer 2017). With BAMSurgeon  
522 (Ewing et al. 2015), 552 mutations were simulated across the 19 trios at random callable sites. The

523 false-negative rate was calculated as  $1 - (\text{number of detected mutations}/\text{number of simulated}$   
524 mutations), after running the pipeline from variant calling. The mutation rate per sites per generation  
525 can then be estimated per trio with the following equation:

$$\mu = \frac{m \times (1 - \beta)}{(1 - \alpha) \times 2 \times C} \quad (1)$$

530 **Sex bias, ages, and relatedness.** *De novo* mutations were phased to their parental origin using the read-  
531 backed phasing method described in Marett et al. 2017 (script available on GitHub:  
532 <https://github.com/besenbacher/POOHA>). The method uses read-pairs that contain both a *de novo*  
533 mutation and another heterozygous variant, the latter of which was used to determine the parental origin  
534 of the mutation if it is present in both offspring and one of the parents. The phasing allowed us to identify  
535 any parental bias in the contribution of the *de novo* mutations. Pearson's correlation test was performed  
536 between the mutation rate and ages of each parent, as well as a linear regression model for father and mother  
537 independently. A multiple linear regression model was performed to predict the mutation rate from both  
538 parental ages as predictor variables. The phased mutations were used to dissociate the effect of the  
539 parental age from one another. Because the total number of SNPs phased to the mother or the father may  
540 differ, we divided the phased *de novo* mutations found in a parent by the total SNPs phased to this parent.  
541 Only a subset of the *de novo* mutations in an offspring was phased. Thus, we applied the paternal to  
542 maternal ratio to the total number of mutations in a trio, referred to as 'upscaled' number of mutations, to  
543 predict the number of total mutations given by each parent at different ages. The two extended trios,  
544 analyzed as independent trios, also allowed us to determine if ~ 50 % of the *de novo* mutations observed  
545 in the first trio were passed on to the next generation.

546  
547 **Characterization of *de novo* mutations.** From all the *de novo* mutations found, the type of mutations  
548 and their frequencies were estimated. For the mutations from a C to any base we determined if they were  
549 followed by a G to detect the CpG sites (similarly if G mutations were preceded by a C. We defined a  
550 cluster as a window of 20,000 bp to qualify how many mutations were clustered together; over all  
551 individuals, looking at related individuals, and within individuals. We simulated 624 mutations following

552 a uniform distribution to compare with our dataset. We investigated the mutations that are shared between  
553 related individuals. Finally, we looked at the location of mutations in the coding region using the  
554 annotation of the reference genome.

555  
556 **Molecular dating using the new mutation rate.** We calculated the effective population size using  
557 Watterson's estimator  $\theta = 4N_e\mu$  (Watterson 1975). We estimated  $\theta$  with the nucleotide diversity  $\pi =$   
558 0.00247 according to a recent population study (Xue et al. 2016). Thus, we calculated the effective  
559 population size as  $N_e = \frac{\pi}{4\mu}$  with  $\mu$  the mutation rate per site per generation estimated in our study. To  
560 calculate divergence time, we converted the mutation rate to a yearly rate based on the regression model of  
561 the number of mutations given by each parent regarding their ages and the average callability  $C =$   
562 2,342,539,326. Given the maturation time and the high mortality due to predation, we assumed an average  
563 age of reproduction in the wild at 10 years old for females and 12 years old for males and a generation  
564 time of 11 years, also reported in another study (Xue et al. 2016). Thus, the yearly mutation rate was:

$$565 \quad \mu = \frac{2.8835 + 0.4827 \times \text{agematernal} - 2.2036 + 2.2588 \times \text{agepaternal} \times (1 - \beta)}{(1 - \alpha) \times 2 \times C} \quad (2)$$

566 The divergence time between species was then calculated using  $T_{\text{divergence}} = \frac{d}{2\mu}$  with  $d$  the genetic  
567 distance between species which were calculated from the whole-genome comparison (Moorjani et al.  
568 2016) and  $\mu$  the yearly mutation rate of rhesus macaques. We also used the confidence interval at 95% of  
569 our mutation rate regression to compute the confidence interval on divergence time. Based on the  
570 coalescent theory (Kingman, 1982), the time to coalescence is  $2N_eG$  with  $G$  the generation time and  $N_e$   
571 the ancestral effective population size, assumed constant over time, as shown in a previous study (Xue et  
572 al. 2016). Thus, we dated the speciation event as previously done by Besenbacher et al. 2019 with:

$$573 \quad T_{\text{speciation}} = T_{\text{divergence}} - 2 \times N_e \text{ ancestor} \times G \quad (3)$$

574

## 575 **Acknowledgments**

576 This project was supported by a Carlsberg Foundation Grant to GZ (CF16-0663), Strategic Priority  
577 Research Program of the Chinese Academy of Sciences (XDB13000000), and ERC Consolidator grant

578 681396 Extinction Genomics. LB was supported by Carlsberg Foundation. We would like to thank  
579 GenomeDK at Aarhus University for providing computational resources and supports to this study. We  
580 also thank Josefin Stiller for helpful comments on the manuscript. Whole-genome sequences have been  
581 deposited in NCBI (National Center for Biotechnology Information) with BioProject number  
582 PRJNA588178.

583

## 584 **Authors contributions**

585 G.Z., M.H.S., S.B. and L.B. conceived this work. J.B. provided the samples. L.B., J. Z., P.L., G.A.P.,  
586 M.H.S.S, and M.T.P.G. participated in extraction, library preparation, and sequencing. MK planned and  
587 executed the experimental validation. L.B. and S.B. built the analyses pipelines and conducted all the  
588 analyses. L.B, G.Z, S.B, and M.H.S wrote this manuscript with the input of all co-authors. G.Z.  
589 supervised this project. The authors declare no competing interests.

590

## 591 **References**

- 592 Acuna-Hidalgo R, Bo T, Kwint MP, Van De Vorst M, Pinelli M, Veltman JA, Hoischen A, Vissers  
593 LELM, Gilissen C. 2015. Post-zygotic Point Mutations Are an Underrecognized Source of de Novo  
594 Genomic Variation. *Am. J. Hum. Genet.* 97:67–74.
- 595 Acuna-Hidalgo R, Veltman JA, Hoischen A. 2016. New insights into the generation and role of de novo  
596 mutations in health and disease. *Genome Biol.* 17.
- 597 Amann RP, Howards SS. 1980. Daily spermatozoal production and epididymal spermatozoal reserves of  
598 the human male. *J. Urol.* 124:211–215.
- 599 Amann RP, Johnson L, Thompson DL, Pickett BW. 1976. Daily Spermatozoal Production, Epididymal  
600 Spermatozoal Reserves and Transit Time of Spermatozoa Through the Epididymis of the Rhesus  
601 Monkey. *Biol. Reprod.* 15:586–592.
- 602 Awadalla P, Gauthier J, Myers RA, Casals F, Hamdan FF, Griffing AR, Côté M, Henrion E, Spiegelman  
603 D, Tarabeux J, et al. 2010. Direct measure of the de novo mutation rate in autism and schizophrenia  
604 cohorts. *Am. J. Hum. Genet.* 87:316–324.
- 605 Benton MJ, Donoghue PCJ, Asher RJ, Friedman M, Near TJ, Vinther J. 2015. Constraints on the  
606 timescale of animal evolutionary history. *Palaeontol. Electron.* 18:1–106.
- 607 Bercovitch FB, Widdig A, Trefilov A, Kessler MJ, Berard JD, Schmidtke J, Nürnberg P, Krawczak M.  
608 2003. A longitudinal study of age-specific reproductive output and body condition among male  
609 rhesus macaques, *Macaca mulatta*. *Naturwissenschaften* 90:309–312.
- 610 Besenbacher S, Hvilsom C, Marques-Bonet T, Mailund T, Schierup MH. 2019. Direct estimation of  
611 mutations in great apes reconciles phylogenetic dating. *Nat. Ecol. Evol.* [Internet] 3:286–292.

- 612 Available from: <http://www.nature.com/articles/s41559-018-0778-x>
- 613 Besenbacher S, Liu S, Izarzugaza JMG, Grove J, Belling K, Bork-Jensen J, Huang S, Als TD, Li S,  
614 Yadav R, et al. 2015. Novel variation and de novo mutation rates in population-wide de novo  
615 assembled Danish trios. *Nat. Commun.* [Internet] 6:5969. Available from:  
616 <http://www.nature.com/doi/10.1038/ncomms6969>
- 617 Besenbacher S, Sulem P, Helgason A, Helgason H, Kristjansson H, Jonasdottir A, Jonasdottir A,  
618 Magnusson OT, Thorsteinsdottir U, Masson G, et al. 2016. Multi-nucleotide de novo Mutations in  
619 Humans. Petrov DA, editor. *PLOS Genet.* [Internet] 12:e1006315. Available from:  
620 <http://dx.plos.org/10.1371/journal.pgen.1006315>
- 621 Byskov AG. 1986. Differential of mammalian embryonic gonad. *Physiol. Rev.* 66:71–117.
- 622 Campbell CR, Tiley GP, Poelstra JW, Hunnicutt KE, Larsen PA, dos Reis M, Yoder AD. 2019. Pedigree-  
623 based measurement of the de novo mutation rate in the gray mouse lemur reveals a high mutation  
624 rate, few mutations in CpG sites, and a weak sex bias. *bioRxiv* [Internet]. Available from:  
625 <http://dx.doi.org/10.1101/724880>
- 626 Chen Y, Chen Y, Shi C, Huang Z, Zhang Y, Li S, Li Y, Ye J, Yu C, Li Z, et al. 2017. SOAPnuke: A  
627 MapReduce acceleration-supported software for integrated quality control and preprocessing of  
628 high-throughput sequencing data. *Gigascience* 7:1–6.
- 629 Crow JF. 2000. The origins, patterns and implications of human spontaneous mutation. *Nat. Rev. Genet.*  
630 1:40–47.
- 631 Drost JB, Lee WR. 1995. Biological basis of germline mutation: Comparisons of spontaneous germline  
632 mutation rates among drosophila, mouse, and human. *Environ. Mol. Mutagen.* [Internet] 25:48–64.  
633 Available from: <http://doi.wiley.com/10.1002/em.2850250609>
- 634 Ewing AD, Houlahan KE, Hu Y, Ellrott K, Caloian C, Yamaguchi TN, Bare JC, P'ng C, Waggott D,  
635 Sabelnykova VY, Kellen MR, et al. 2015. Combining tumor genome simulation with crowdsourcing  
636 to benchmark somatic single-nucleotide-variant detection. *Nature methods.* 12(7), 623-630.
- 637 Francioli LC, Polak PP, Koren A, Menelaou A, Chun S, Renkens I. 2015. Genome-wide patterns and  
638 properties of de novo mutations in humans. *Nat. Genet.* [Internet] 47:822. Available from:  
639 <https://www.ncbi.nlm.nih.gov/pmc/articles/PMC4485564/pdf/nihms-679155.pdf>
- 640 Gao Z, Moorjani P, Sasani TA, Pedersen BS, Quinlan AR, Jorde LB, Amster G, Przeworski M. 2019.  
641 Overlooked roles of DNA damage and maternal age in generating human germline mutations. *Proc.*  
642 *Natl. Acad. Sci. U. S. A.* [Internet] 116:9491–9500. Available from:  
643 <http://www.ncbi.nlm.nih.gov/pubmed/31019089>
- 644 Gibbs RA, Rogers J, Katze MG, Bumgarner R, Weinstock GM, Mardis ER, Remington KA, Strausberg  
645 RL, Venter JC, Wilson RK, et al. 2007. Evolutionary and biomedical insights from the rhesus  
646 macaque genome. *Science* (80-. ). [Internet] 316:222–234. Available from:  
647 <http://science.sciencemag.org/>
- 648 Goldmann JM, Wong WSW, Pinelli M, Farrah T, Bodian D, Stittrich AB, Glusman G, Vissers LELM,  
649 Hoischen A, Roach JC, et al. 2016. Parent-of-origin-specific signatures of de novo mutations. *Nat.*  
650 *Genet.*

- 651 Goodman M, Porter CA, Czelusniak J, Page SL, Schneider H, Shoshani J, Gunnell G, Groves CP. 1998.  
652 Toward a Phylogenetic Classification of Primates Based on DNA Evidence Complemented by  
653 Fossil Evidence. *Mol. Phylogenet. Evol.*
- 654 Goodman MF, Creighton S, Bloom LB, Petruska J, Kunkel TA. 1993. Biochemical Basis of DNA  
655 Replication Fidelity. *Crit. Rev. Biochem. Mol. Biol.* [Internet] 28:83–126. Available from:  
656 <https://www.tandfonline.com/action/journalInformation?journalCode=ibmg20>
- 657 Halldorsson B V., Palsson G, Stefansson OA, Jonsson H, Hardarson MT, Eggertsson HP, Gunnarsson B,  
658 Oddsson A, Halldorsson GH, Zink F, et al. 2019. Characterizing mutagenic effects of recombination  
659 through a sequence-level genetic map. *Science* (80-. ). 363.
- 660 Heads M. 2005. Dating nodes on molecular phylogenies: A critique of molecular biogeography.  
661 *Cladistics* 21:62–78.
- 662 Hernandez RD, Hubisz MJ, Wheeler DA, Smith DG, Ferguson B, Rogers J, ... & Muzny D. 2007.  
663 Demographic histories and patterns of linkage disequilibrium in Chinese and Indian rhesus  
664 macaques. *Science*, 316(5822), 240-243.
- 665 Ho SYW, Larson G. 2006. Molecular clocks: When times are a-changin'. *Trends Genet.* 22:79–83.
- 666 Jónsson H, Sulem P, Arnadóttir GA, Pálsson G, Eggertsson HP, Kristmundsdóttir S, Zink F, Kehr B,  
667 Hjorleifsson KE, Jensson BÖ, et al. 2018. Multiple transmissions of de novo mutations in families.  
668 *Nat. Genet.* [Internet] 50:1674. Available from: <http://www.nature.com/articles/s41588-018-0259-9>
- 669 Jónsson H, Sulem P, Kehr B, Kristmundsdóttir S, Zink F, Hjartarson E, Hardarson MT, Hjorleifsson KE,  
670 Eggertsson HP, Gudjonsson SA, et al. 2017. Parental influence on human germline de novo  
671 mutations in 1,548 trios from Iceland. *Nature* [Internet] 549:519–522. Available from:  
672 <http://www.nature.com/doi/10.1038/nature24018>
- 673 Keightley PD, Pinharanda A, Ness RW, Simpson F, Dasmahapatra KK, Mallet J, ... & Jiggins CD. 2015.  
674 Estimation of the spontaneous mutation rate in *Heliconius melpomene*. *Molecular biology and*  
675 *evolution*, 32(1), 239-243.
- 676 Kingman JFC. 1982. The coalescent. *Stochastic Processes and Their Applications*, 13(3), 235–248.  
677 [https://doi.org/10.1016/0304-4149\(82\)90011-4](https://doi.org/10.1016/0304-4149(82)90011-4)
- 678 Kong A, Frigge ML, Masson G, Besenbacher S, Sulem P, Magnusson G, Gudjonsson SA, Sigurdsson A,  
679 Jonasdóttir A, Jonasdóttir A, et al. 2012. Rate of de novo mutations and the importance of father's  
680 age to disease risk. *Nature* [Internet] 488:471. Available from:  
681 <https://www.nature.com/articles/nature11396.pdf>
- 682 Lapierre M, Lambert A, Achaz G. 2017. Accuracy of demographic inferences from the site frequency  
683 spectrum: The case of the Yoruba population. *Genetics* 206:139–449.
- 684 Li WH, Ellsworth DL, Krushkal J, Chang BHJ, Hewett-Emmett D. 1996. Rates of nucleotide substitution  
685 in primates and rodents and the generation-time effect hypothesis. *Mol. Phylogenet. Evol.* 5:182–  
686 187.
- 687 Lindsay SJ, Rahbari R, Kaplanis J, Keane T, Hurles ME. 2019. Similarities and differences in patterns of  
688 germline mutation between mice and humans. *Nat. Commun.* 10:1–12.

- 689 Manichaikul A, Mychaleckyj JC, Rich SS, Daly K, Sale M, Chen WM. 2010. Robust relationship  
690 inference in genome-wide association studies. *Bioinformatics* 26:2867–2873.
- 691 Maretty L, Jensen JM, Petersen B, Sibbesen JA, Liu S, Villesen P, Skov L, Belling K, Theil Have C,  
692 Izarzugaza JMG, et al. 2017. Sequencing and de novo assembly of 150 genomes from Denmark as a  
693 population reference. *Nature* [Internet] 548:87–91. Available from:  
694 <https://www.nature.com/doi/10.1038/nature23264>
- 695 Moorjani P, Amorim CEG, Arndt PF, Przeworski M. 2016. Variation in the molecular clock of primates.  
696 *Proc. Natl. Acad. Sci. U. S. A.* [Internet] 113:10607–10612. Available from:  
697 <http://www.ncbi.nlm.nih.gov/pubmed/27601674>
- 698 Neale BM, Devlin B, Boone BE, Levy SE, Lihm J, Buxbaum JD, Wu Y, Lewis L, Han Y, Boerwinkle E,  
699 et al. 2012. Patterns and rates of exonic de novo mutations in autism spectrum disorders. *Nature*  
700 485:242–246.
- 701 Ohta T. 1993. An examination of the generation-time effect on molecular evolution. *Proc. Natl. Acad.*  
702 *Sci. USA* 90:10676–10680.
- 703 Oliveira S, Cooper DN, Azevedo L. 2018. De Novo Mutations in Human Inherited Disease. In: eLS. John  
704 Wiley & Sons, Ltd. p. 1–7.
- 705 Perelman P, Johnson WE, Roos C, Seuánez HN, Horvath JE, Moreira MAM, Kessing B, Pontius J,  
706 Roelke M, Rumpler Y, et al. 2011. A Molecular Phylogeny of Living Primates. Brosius J, editor.  
707 *PLoS Genet.* [Internet] 7:e1001342. Available from:  
708 <https://dx.plos.org/10.1371/journal.pgen.1001342>
- 709 Pfeifer SP. 2017. Direct estimate of the spontaneous germ line mutation rate in African green monkeys.  
710 *Evolution* (N. Y.) [Internet] 71:2858–2870. Available from:  
711 <http://doi.wiley.com/10.1111/evo.13383>
- 712 Poplin R, Ruano-Rubio V, DePristo MA, Fennell TJ, Carneiro MO, Auwera GA Van der, Kling DE,  
713 Gauthier LD, Levy-Moonshine A, Roazen D, et al. 2018. Scaling accurate genetic variant discovery  
714 to tens of thousands of samples. *bioRxiv* [Internet]:201178. Available from:  
715 <https://www.biorxiv.org/content/10.1101/201178v2>
- 716 Pozzi L, Hodgson JA, Burrell AS, Sterner KN, Raaum RL, Disotell TR. 2014. Primate phylogenetic  
717 relationships and divergence dates inferred from complete mitochondrial genomes. *Mol.*  
718 *Phylogenet. Evol.* 75:165–183.
- 719 Pulquério MJF, Nichols RA. 2007. Dates from the molecular clock: how wrong can we be? *Trends Ecol.*  
720 *Evol.* 22:180–184.
- 721 Rahbari R, Wuster A, Lindsay SJ, Hardwick RJ, Alexandrov LB, Turki S Al, Dominiczak A, Morris A,  
722 Porteous D, Smith B, et al. 2016. Timing, rates and spectra of human germline mutation. *Nat.*  
723 *Genet.* [Internet] 48:126–133. Available from:  
724 [http://www.nature.com/authors/editorial\\_policies/license.html#terms](http://www.nature.com/authors/editorial_policies/license.html#terms)
- 725 Rawlins RG, Kessler MJ. 1986. *The Cayo Santiago Macaques: History, Behavior, and Biology.* Available  
726 from:  
727 <https://books.google.fr/books?hl=en&lr=&id=3fMCzTve890C&oi=fnd&pg=PR9&dq=The+Cayo+S>

- 728 antiago+macaques:+History,+behavior,+and+biology&ots=wwfUkTHWoC&sig=SUQ3CN6nFJo3h  
729 521NL6uKEzrRD4#v=onepage&q=The Cayo Santiago macaques%3A History%2C behavior%2C  
730 and biology
- 731 Roach JC, Glusman G, Smit AFA, Huff CD, Hubley R, Shannon PT, Rowen L, Pant KP, Goodman N,  
732 Bamshad M, et al. 2010. Analysis of Genetic Inheritance in a Family Quartet by Whole Genome  
733 Sequencing. *Science* (80-. ). [Internet] 328:636–639. Available from:  
734 <https://www.ncbi.nlm.nih.gov/pmc/articles/PMC3037280/pdf/nihms247436.pdf>
- 735 Rosenberg N. A., & Nordborg M. 2002. Genealogical trees, coalescent theory and the analysis of genetic  
736 polymorphisms. *Nature Reviews Genetics*, Vol. 3, pp. 380–390. <https://doi.org/10.1038/nrg795>
- 737 Scally A. 2016. Mutation rates and the evolution of germline structure. *Philos. Trans. R. Soc. B Biol. Sci.*  
738 [Internet] 371:20150137. Available from: <http://dx.doi.org/10.1098/rstb.2015.0137>
- 739 Schrago CG. 2014. The effective population sizes of the anthropoid ancestors of the human-chimpanzee  
740 lineage provide insights on the historical biogeography of the great apes. *Mol. Biol. Evol.* 31:37–47.
- 741 Ségurel L, Wyman MJ, Przeworski M. 2014. Determinants of Mutation Rate Variation in the Human  
742 Germline. *Annu. Rev. Genomics Hum. Genet.* [Internet] 15:47–70. Available from:  
743 <http://www.annualreviews.org/doi/10.1146/annurev-genom-031714-125740>
- 744 Song K, Li L, Zhang G. 2016. Coverage recommendation for genotyping analysis of highly heterologous  
745 species using next-generation sequencing technology. *Sci. Rep.* 6:35736.
- 746 Steiper ME, Young NM. 2008. Timing primate evolution: Lessons from the discordance between  
747 molecular and paleontological estimates. *Evol. Anthropol.* 17:179–188.
- 748 Stewart C-B, Disotell TR. 1998. Primate evolution – in and out of Africa. *Curr. Biol.* [Internet] 8:R582–  
749 R588. Available from: <https://linkinghub.elsevier.com/retrieve/pii/S0960982207003673>
- 750 Tatsumoto S, Go Y, Fukuta K, Noguchi H, Hayakawa T, Tomonaga M, Hirai H, Matsuzawa T, Agata K,  
751 Fujiyama A. 2017. Direct estimation of de novo mutation rates in a chimpanzee parent-offspring trio  
752 by ultra-deep whole genome sequencing. *Sci. Rep.* 7.
- 753 Teeling EC, Springer MS, Madsen O, Bates P, O’Brien SJ, Murphy WJ. 2005. A molecular phylogeny  
754 for bats illuminates biogeography and the fossil record. *Science* (80-. ). 307:580–584.
- 755 Thomas GWC, Wang RJ, Puri A, Rogers J, Radivojac P, Hahn MW, Thomas GWC, Wang RJ, Puri A,  
756 Harris RA, et al. 2018. Reproductive Longevity Predicts Mutation Rates in Primates. *Curr. Biol.*  
757 [Internet] 28:1–5. Available from: <https://doi.org/10.1016/j.cub.2018.08.050>
- 758 Venn O, Turner I, Mathieson I, De Groot N, Bontrop R, McVean G. 2014. Strong male bias drives  
759 germline mutation in chimpanzees. *Science* (80-. ). 344:1272–1275.
- 760 Wang H, Zhu X. 2014. De novo mutations discovered in 8 Mexican American families through whole  
761 genome sequencing. *BMC Proc.* [Internet] 8:S24. Available from:  
762 <https://www.ncbi.nlm.nih.gov/pmc/articles/PMC4143763/pdf/1753-6561-8-S1-S24.pdf>
- 763 Wang RJ, Thomas GWC, Raveendran M, Harris RA, Doddapaneni H, Muzny DM, Capitano JP,  
764 Radivojac P, Rogers J, Hahn MW. 2019. Paternal age in rhesus macaques is positively associated



- 765 with germline mutation accumulation but not with measures of offspring sociability. bioRxiv  
766 [Internet]:706705. Available from: <http://dx.doi.org/10.1101/706705>
- 767 Watterson GA. 1975. On the number of segregating sites in genetical models without recombination.  
768 *Theor. Popul. Biol.* 7:256–276.
- 769 Wu C-I, Li W-H. 1985. Evolution evidence for higher rates of nucleotide substitution in rodents than in  
770 man. *Proc. Natl. Acad. Sci. USA* 82:1741–1745.
- 771 Wu FL, Strand A, Ober C, Wall JD, Moorjani P, Przeworski M. 2019. A comparison of humans and  
772 baboons suggests germline mutation rates do not track cell divisions. bioRxiv:844910.
- 773 Xue C, Raveendran M, Harris RA, Fawcett GL, Liu X, White S, Dahdouli M, Rio Deiros D, Below JE,  
774 Salerno W, et al. 2016. The population genomics of rhesus macaques (*Macaca mulatta*) based on  
775 whole-genome sequences. *Genome Res.* [Internet] 26:1651–1662. Available from:  
776 <http://www.ncbi.nlm.nih.gov/pubmed/27934697>
- 777 Yuan Q, Zhou Z, Lindell SG, Higley JD, Ferguson B, Thompson RC, Lopez JF, Suomi SJ, Baghal B,  
778 Baker M, et al. 2012. The rhesus macaque is three times as diverse but more closely equivalent in  
779 damaging coding variation as compared to the human. *BMC Genet.* [Internet] 13:52. Available  
780 from: <http://www.ncbi.nlm.nih.gov/pubmed/22747632>
- 781 Yuen RKC, Merico D, Cao H, Pellicchia G, Alipanahi B, Thiruvahindrapuram B, et al. 2016. Genome-  
782 wide characteristics of de novo mutations in autism. *Npj Genomic Medicine.* 1:1–10.  
783 <https://doi.org/10.1038/npjgenmed.2016.27>
- 784 Zeng K, Jackson BC, Barton HJ. 2018. Methods for estimating demography and detecting between-locus  
785 differences in the effective population size and mutation rate. *Mol. Biol. Evol.* 36:423–433.
- 786

## Figures and Tables

a

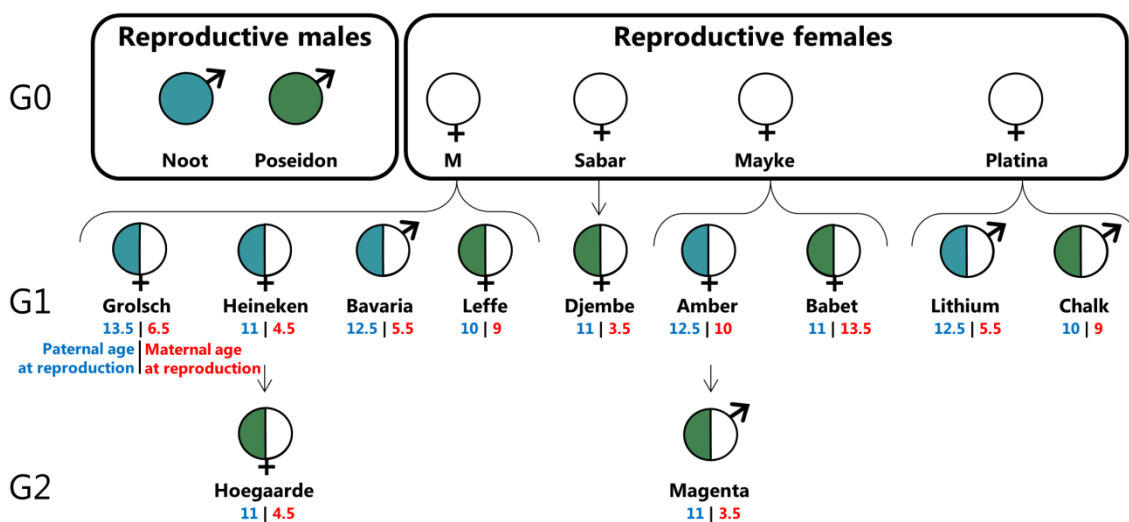

b

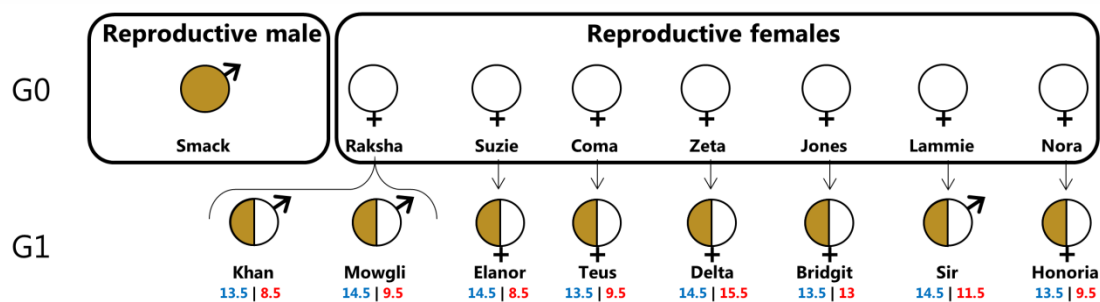

Fig 1 - Pedigree of the 19 trios used for the direct estimation of mutation rate. a, The first group is composed of two reproductive males and four reproductive females. b, The second group contained one reproductive male and seven reproductive females. In each offspring, the color on the left corresponds to the paternal lineage and under the name are the age of the father (in blue) and mother (in red) at the time of reproduction. The reproductive ranges are 4.5 years for males and 12.2 years for females.

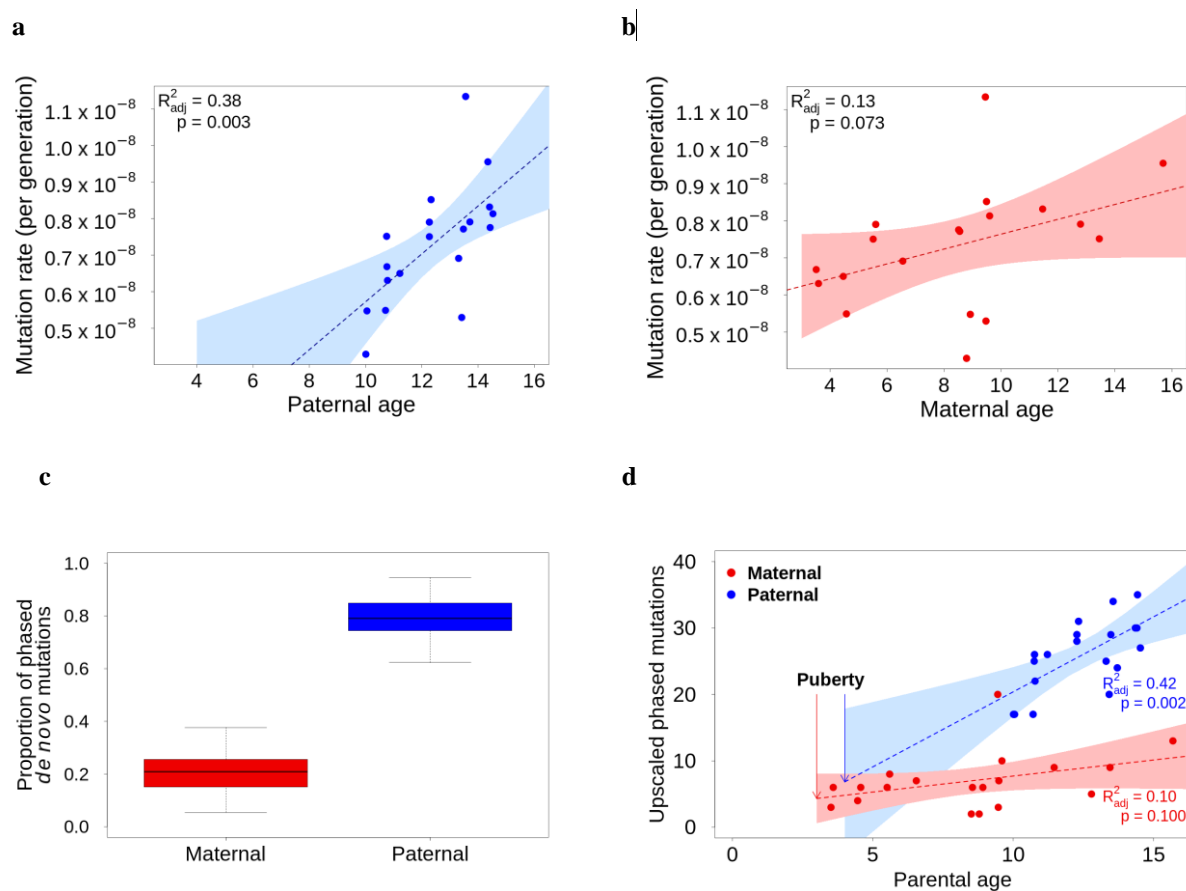

Fig. 2 - Parental contribution and age effect to the *de novo* mutation rate. a, There is a positive correlation between the mutation rate and the paternal age. b, The correlation between maternal age and mutation rate is not significant. c, Males contribute to 79.7 % of the *de novo* mutations while females contribute to 23.3 % of them. d, Upscaled number of *de novo* mutations given by each parent shows a similar contribution at the age of sexual maturation and a substantial increase with male age.

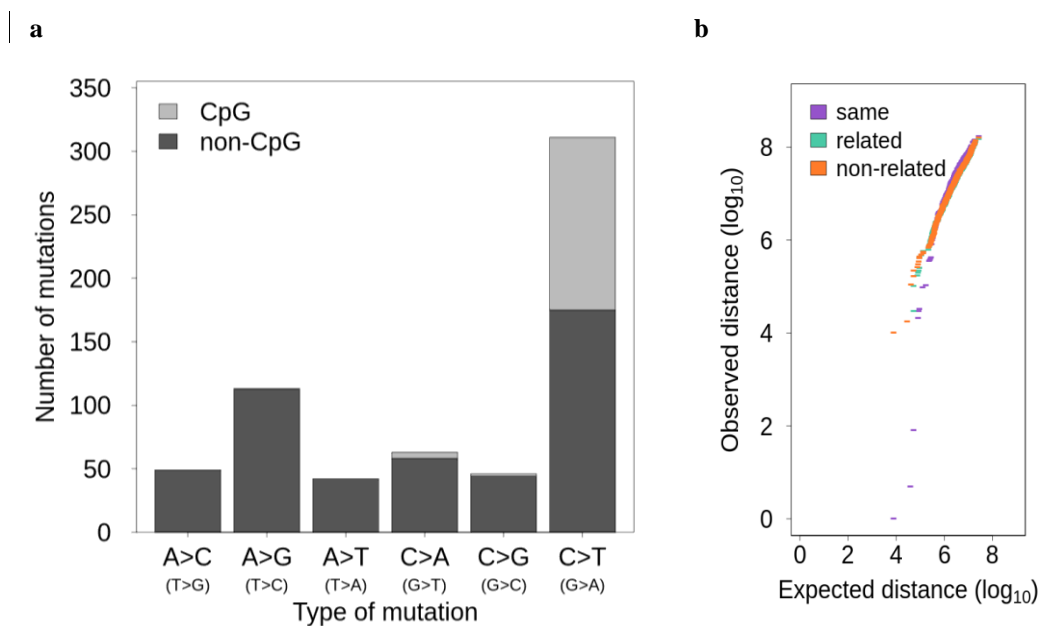

Fig. 3 - Characterizations of the *de novo* mutations. a, The type of *de novo* mutations in CpG and non-CpG sites. b, QQ-plot of the distance between *de novo* mutations compared to a uniform distribution within individuals (purple), between related individuals (green), and between non-related individuals (orange).

a

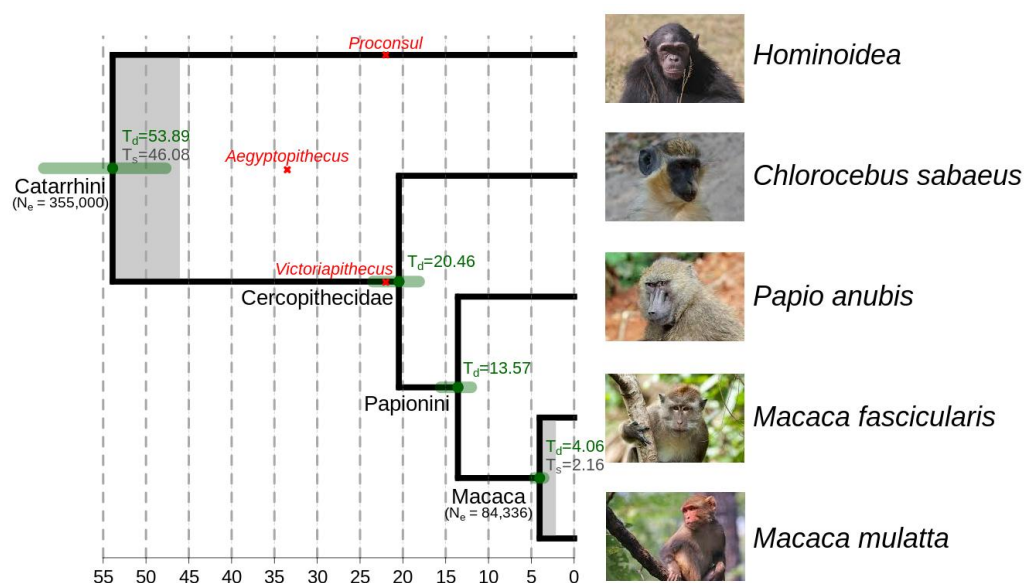

b

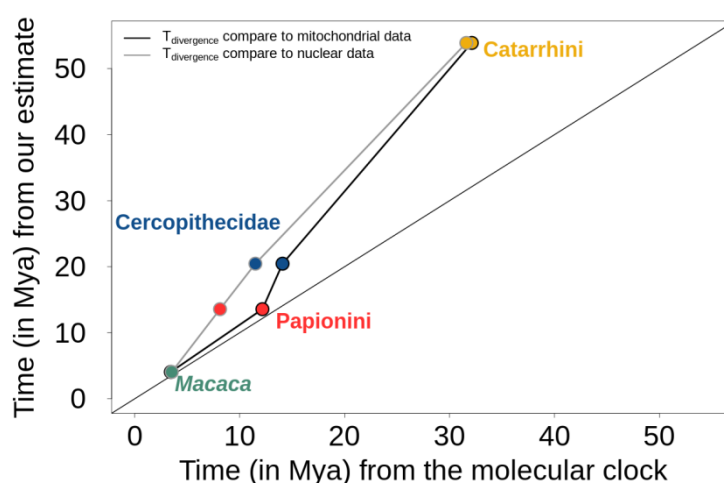

Fig. 4 - Molecular dating with pedigree-based mutation rate. a, Primates phylogeny based on the yearly mutation rate ( $0.60 \times 10^{-9}$  per site per year). In green are the confidence interval of our divergence time estimates ( $T_d$ ) and grey shades represent the time of speciation ( $T_s$ ). The effective population sizes are indicated under the nodes ( $N_e$  Macaca ancestor is our estimate of  $N_e$  *Macaca mulatta* and  $N_e$  Catarrhini from the literature (Schrägo 2014)). b, Comparison of our divergence time and speciation time with the previous estimation using the molecular clock from mitochondrial (Pozzi et al. 2014) and nuclear data (Perelman et al. 2011) calibrated with fossils records.

**Table 1 – Six mutations shared between two related individuals.**

| Chrom. | Position  | REF | ALT | Sibling 1 | Phasing | Sibling 2 | Phasing <sup>a</sup> | Common parent | Name parent |
|--------|-----------|-----|-----|-----------|---------|-----------|----------------------|---------------|-------------|
| 6      | 132663101 | A   | T   | Amber     | U       | Babet     | M                    | mother        | Mayke       |
| 7      | 60635102  | G   | T   | Sir       | U       | Honorio   | U                    | father        | Smack       |
| 7      | 116648579 | G   | A   | Amber     | M       | Babet     | U                    | mother        | Mayke       |
| 10     | 65163492  | G   | A   | Khan      | P       | Delta     | P                    | father        | Smack       |
| 19     | 7047030   | C   | T   | Leffe     | U       | Djembe    | U                    | father        | Poseidon    |
| 19     | 15861061  | C   | T   | Bavaria   | P       | Lithium   | U                    | father        | Noot        |

a: P: paternal; M: maternal; U: unphased
